# Supplementary material
Source: Springer Nature journal article supplement (https://www.springermedizin.de/resource/supplementary/13023_2013_600_MOESM6_ESM.pdf/9642826)

346

Cytoplasm

51 R R U 53

134 T A R R S R H U R 143

189 U P H E R E L S F 198

272 Q U R R A Q L G M 280

336

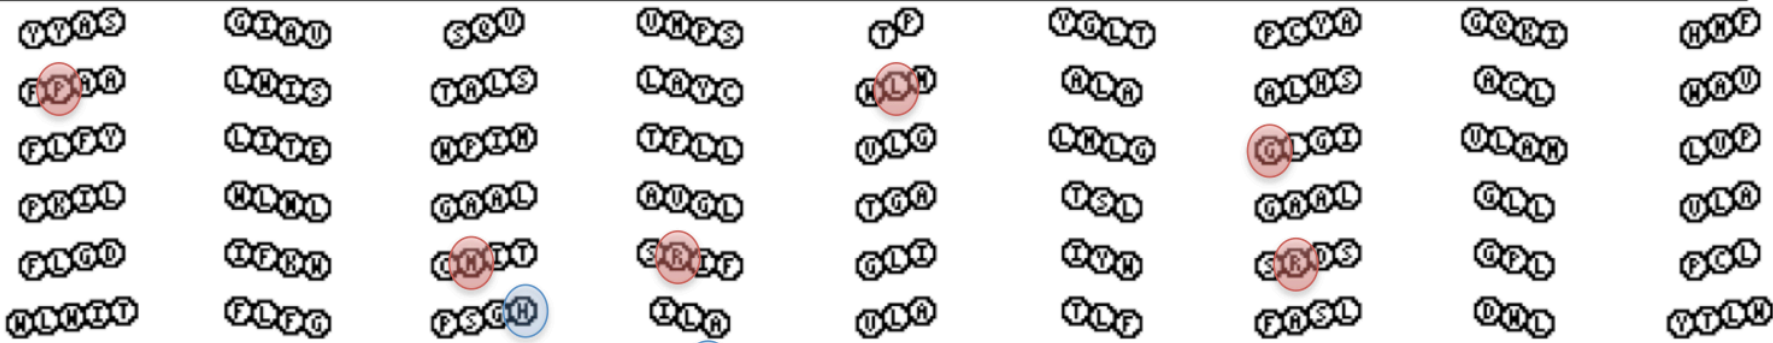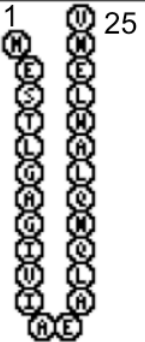

316

Endoplasmic reticulum lumen (Active side)

Supplement: MOESM6 [file 9642826]
